# Supplementary material for: Healthcare Utilization and Outcomes in Atrial Fibrillation Patients Treated by Drug Therapy versus a Catheter Ablation Strategy—A Middle European Propensity Score Matched Cohort Study
Source: MDPI journal article supplement (doi:10.3390/jcdd9120451), 2022-12-10
Supplement: s1 [file s1]

**Table S1. suppl. – Comparison of all non-PVI and PVI patients in the database without matching.**

|                               | Ø Non - PVI | Ø PVI     | Diff.     | 95% CI    |           | Sign. |
|-------------------------------|-------------|-----------|-----------|-----------|-----------|-------|
| Patient Characteristics       |             |           |           |           |           |       |
| Female                        | 0.520       | 0.316     | -0.204    | -0.229    | -0.179    | ***   |
| Age <sup>†</sup>              | 71.557      | 58.267    | -13.290   | -13.926   | -12.654   | ***   |
| Age < 55 <sup>†</sup>         | 0.095       | 0.337     | 0.241     | 0.226     | 0.257     | ***   |
| Age 55 -- 65 <sup>†</sup>     | 0.176       | 0.395     | 0.219     | 0.199     | 0.239     | ***   |
| Age > 65 <sup>†</sup>         | 0.728       | 0.268     | -0.460    | -0.483    | -0.438    | ***   |
| Deceased until 2018           | 0.314       | 0.081     | -0.233    | -0.256    | -0.210    | ***   |
| Labour Market Outcomes        |             |           |           |           |           |       |
| Employed <sup>†</sup>         | 0.164       | 0.531     | 0.366     | 0.346     | 0.387     | ***   |
| Unemployed <sup>†</sup>       | 0.016       | 0.030     | 0.014     | 0.007     | 0.021     | ***   |
| Retired <sup>†</sup>          | 0.838       | 0.466     | -0.372    | -0.392    | -0.351    | ***   |
| Risk Factor Diagnoses         |             |           |           |           |           |       |
| Heart Failure                 | 0.259       | 0.142     | -0.118    | -0.139    | -0.096    | ***   |
| Hypertension                  | 0.148       | 0.123     | -0.026    | -0.044    | -0.008    | ***   |
| Diabetes                      | 0.064       | 0.034     | -0.030    | -0.042    | -0.018    | ***   |
| TIA/Stroke                    | 0.154       | 0.091     | -0.064    | -0.082    | -0.046    | ***   |
| Coronary Heart Disease        | 0.237       | 0.280     | 0.044     | 0.022     | 0.065     | ***   |
| Peripheral Artery Disease     | 0.076       | 0.033     | -0.043    | -0.056    | -0.030    | ***   |
| Hyperlipidemia                | 0.003       | 0.011     | 0.008     | 0.005     | 0.011     | ***   |
| Renal Failure                 | 0.067       | 0.023     | -0.045    | -0.057    | -0.032    | ***   |
| Dementia                      | 0.044       | 0.009     | -0.036    | -0.046    | -0.026    | ***   |
| Four Quarters Before First AF |             |           |           |           |           |       |
| Hospital Days                 | 1.683       | 0.907     | -0.776    | -0.923    | -0.630    | ***   |
| DRG Points                    | 750.880     | 429.658   | -321.222  | -398.021  | -244.424  | ***   |
| DRG Turnover                  | 976.135     | 549.943   | -426.192  | -526.452  | -325.932  | ***   |
| Drug Expenditure              | 218.872     | 137.542   | -81.330   | -108.562  | -54.099   | ***   |
| Outpatient Medical Care       | 172.055     | 160.098   | -11.957   | -18.593   | -5.321    | ***   |
| Sick Leave Days               | 0.840       | 2.600     | 1.761     | 1.492     | 2.029     | ***   |
| Quarter of First AF           |             |           |           |           |           |       |
| Hospital Days                 | 8.538       | 6.311     | -2.227    | -2.668    | -1.787    | ***   |
| DRG Points                    | 3,195.315   | 4,268.696 | 1,073.381 | 836.560   | 1,310.201 | ***   |
| DRG Turnover                  | 4,159.938   | 5,503.132 | 1,343.193 | 1,033.377 | 1,653.010 | ***   |
| Drug Expenditure              | 308.309     | 222.561   | -85.747   | -138.807  | -32.687   | ***   |
| Outpatient Medical Care       | 226.005     | 212.559   | -13.446   | -26.165   | -0.728    | **    |
| Sick Leave Days               | 2.116       | 7.786     | 5.670     | 4.996     | 6.343     | ***   |
| Four Quarters After First AF  |             |           |           |           |           |       |
| Hospital Days                 | 2.620       | 1.910     | -0.710    | -0.891    | -0.530    | ***   |
| DRG Points                    | 1,103.234   | 1,417.350 | 314.116   | 222.959   | 405.273   | ***   |
| DRG Turnover                  | 1,441.653   | 1,836.759 | 395.105   | 275.492   | 514.719   | ***   |
| Drug Expenditure              | 301.364     | 206.549   | -94.815   | -127.811  | -61.819   | ***   |
| Outpatient Medical Care       | 198.874     | 182.281   | -16.593   | -23.416   | -9.770    | ***   |
| Sick Leave Days               | 1.448       | 5.189     | 3.741     | 3.340     | 4.141     | ***   |

Note - Gross data of all Atrial Fibrillation (AF) patients in the data base (medically treated by rate or rhythm control versus PVI) showing significant differences in demographics, cardiovascular risk factors, in health care expenditure and socio-economic characteristics. DRG – diagnosis-related groups; DRG turnover is the actual accounting calculated from the DRG points. \*\*\* p < 0.01. † - measured at first AF

**Table S2.** suppl. – Patient characteristics after propensity score matching.

|                                     | Ø Non - PVI | Ø PVI   | Diff.     | p-value | 95% CI             |
|-------------------------------------|-------------|---------|-----------|---------|--------------------|
| <b>Health Care Utilisation</b>      |             |         |           |         |                    |
| Hospital Days                       | 0.709       | 0.725   | 0.017     | 0.824   | [-0.130, 0.163]    |
| DRG Points                          | 397.792     | 340.071 | -57.721   | 0.273   | [-160.955, 45.513] |
| DRG Turnover                        | 514.829     | 439.525 | -75.304   | 0.273   | [-209.993, 59.386] |
| Drug Expenditure                    | 121.718     | 109.760 | -11.958   | 0.521   | [-48.473, 24.557]  |
| Outpatient Medical Care             | 123.710     | 140.203 | 16.493*** | 0.000   | [7.632, 25.354]    |
| <b>Pacemakers and Cardioversion</b> |             |         |           |         |                    |
| Pacemaker                           | 0.001       | 0.002   | 0.001     | 0.564   | [-0.002, 0.004]    |
| Implantable Cardioverter-Defi.      | 0.002       | 0.000   | -0.002    | 0.157   | [-0.005, 0.001]    |
| Cardioversion                       | 0.007       | 0.019   | 0.012**   | 0.018   | [0.002, 0.022]     |
| <b>Labour Market Outcomes</b>       |             |         |           |         |                    |
| Employed                            | 0.730       | 0.768   | 0.038**   | 0.046   | [0.001, 0.076]     |
| Unemployed                          | 0.068       | 0.064   | -0.004    | 0.721   | [-0.026, 0.018]    |
| Retired                             | 0.288       | 0.255   | -0.034*   | 0.089   | [-0.072, 0.005]    |
| Blue Collar                         | 0.393       | 0.397   | 0.004     | 0.875   | [-0.046, 0.054]    |
| Sick Leave Days                     | 3.928       | 3.950   | 0.022     | 0.964   | [-0.929, 0.973]    |
| <b>Relevant Medication</b>          |             |         |           |         |                    |
| <i>Expenditures</i>                 |             |         |           |         |                    |
| Antithrombotic (B01*)               | 8.497       | 13.576  | 5.078***  | 0.000   | [2.780, 7.377]     |
| Antiarrhythmic (C01*)               | 2.391       | 9.638   | 7.247***  | 0.000   | [6.083, 8.411]     |
| Antihypertensive (C02*)             | 8.160       | 0.976   | -7.184*   | 0.062   | [-14.715, 0.347]   |
| Antidiabetic (A10*)                 | 4.434       | 2.503   | -1.930*** | 0.001   | [-3.061, -0.800]   |
| Lipid-Lowering Drugs (C10*)         | 4.239       | 5.352   | 1.113*    | 0.066   | [-0.072, 2.297]    |
| <i>Prescription Probability</i>     |             |         |           |         |                    |
| Antithrombotic (B01*)               | 0.223       | 0.292   | 0.069***  | 0.000   | [0.031, 0.107]     |
| Antiarrhythmic (C01*)               | 0.100       | 0.270   | 0.171***  | 0.000   | [0.138, 0.204]     |
| Antihypertensive (C02*)             | 0.047       | 0.031   | -0.017*   | 0.051   | [-0.034, 0.000]    |
| Antidiabetic (A10*)                 | 0.050       | 0.042   | -0.008    | 0.398   | [-0.026, 0.010]    |
| Lipid-Lowering Drugs (C10*)         | 0.126       | 0.142   | 0.016     | 0.297   | [-0.014, 0.046]    |
| <b>Drugs by ATC Chapter</b>         |             |         |           |         |                    |
| Alimentary Tract                    | 10.731      | 7.977   | -2.754*** | 0.000   | [-4.287, -1.220]   |
| Blood                               | 30.746      | 13.733  | -17.014*  | 0.091   | [-36.750, 2.723]   |
| Cardiovascular System               | 34.186      | 33.881  | -0.305    | 0.941   | [-8.339, 7.729]    |
| Nervous System                      | 9.152       | 4.037   | -5.114*** | 0.000   | [-6.962, -3.266]   |
| Respiratory System                  | 6.258       | 5.369   | -0.889    | 0.261   | [-2.441, 0.663]    |

Note – DRG – diagnosis related groups. \*\*\* p < 0.01, \*\* p < 0.05, \* p < 0.1. Standard errors are corrected for heteroscedasticity.

**Figure S1.** suppl. – Observability of Matching Specifications. Number of observations of the propensity score parameters.

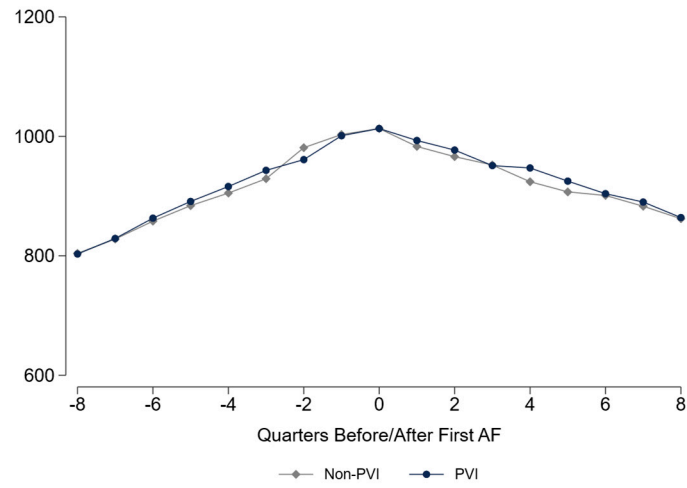

**Figure S2.** suppl. – Difference in Propensity Scores of Matching Specifications.

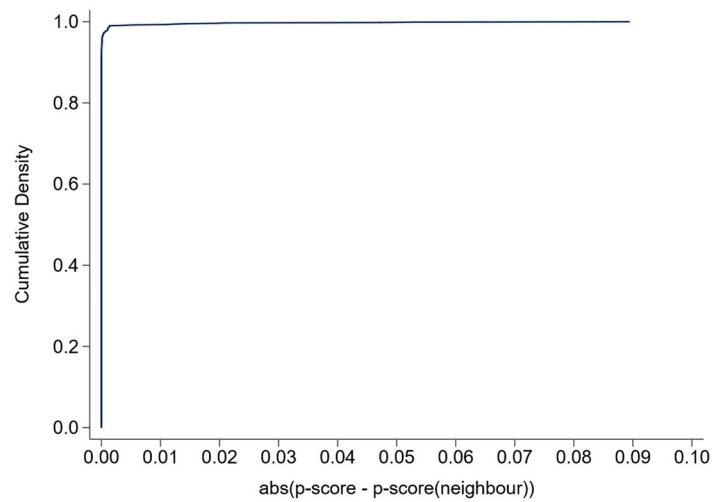

abs = absolute difference in propensity scores for each matching pair

**Figure S3.** suppl. – Balancing Check – Standardized % bias.

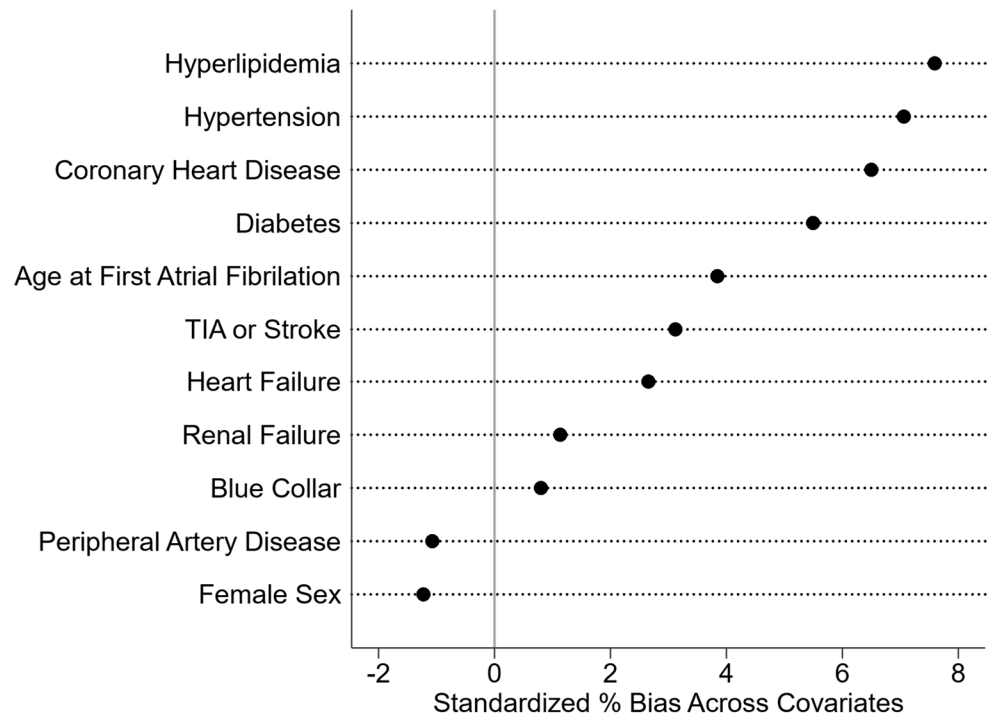

The standardized % bias is the difference in means between non-PVI and PVI patients as a percentage of the average standard deviation of both groups.
